# Supplementary material for: Facing the Unknown: Healthcare Workers’ Concerns, Experiences, and Burnout during the COVID-19 Pandemic—A Mixed-Methods Study in an Israeli Hospital
Source: MDPI journal article supplement (doi:10.3390/su13169021), 2021-08-12
Supplement: s1 [file s1]

Archive with 2 entries (2 files):
- Supplementary S1 - Questionnaire.pdf
- Supplementary S2 - Interview Guide & Consent Form.pdf
