# Supplementary material for: Facing the Unknown: Healthcare Workers’ Concerns, Experiences, and Burnout during the COVID-19 Pandemic—A Mixed-Methods Study in an Israeli Hospital
Source: MDPI journal article supplement (doi:10.3390/su13169021), 2021-08-12
Supplement: s1 [file s1]

### Supplementary S1:

Dear participant,

Medical staff are at the forefront of coping with and treating COVID-19 patients. Below is a short survey about your feelings regarding the crisis and coping with the outbreak. The survey is confidential and anonymous, and completing it will take no more than five minutes. The findings will allow the formulation of recommendations for policy makers. Thank you for your cooperation. For more information, contact Dr. Keren Dopelt [dopelt@bgu.ac.il](mailto:dopelt@bgu.ac.il)

Have you treated/are you treating COVID-19 patients at work?

1. Yes
2. No

Were you in quarantine or have you been infected with coronavirus since the start of the outbreak?

1. No
2. I was quarantined due to exposure at work
3. I was quarantined due to travel abroad or exposure outside of work
4. I was infected with coronavirus

Have you been tested for COVID-19?

1. Yes
2. No, I didn't need to be tested
3. No, but I would have liked to be tested
4. No, even though I requested to be tested

Rate the degree to which you are concerned about the following issues as related to coronavirus:

|                                                                                                                 | Not at all concerned | 2 | 3 | 4 | Extremely concerned | Not relevant |
|-----------------------------------------------------------------------------------------------------------------|----------------------|---|---|---|---------------------|--------------|
| 1. Contracting COVID-19                                                                                         |                      |   |   |   |                     |              |
| 2. Infecting my family with COVID-19                                                                            |                      |   |   |   |                     |              |
| 3. The infection rate in Israel                                                                                 |                      |   |   |   |                     |              |
| 4. Shortage of beds to accommodate all patients                                                                 |                      |   |   |   |                     |              |
| 5. Shortage of ventilators                                                                                      |                      |   |   |   |                     |              |
| 6. Lack of an effective treatment for the virus                                                                 |                      |   |   |   |                     |              |
| 7. Shortage of personal protective equipment                                                                    |                      |   |   |   |                     |              |
| 8. The economic crisis that will follow the coronavirus crisis                                                  |                      |   |   |   |                     |              |
| 9. It is unclear when the coronavirus crisis will end                                                           |                      |   |   |   |                     |              |
| 10. If one of my family members gets sick, they won't be able to receive treatment in the current circumstances |                      |   |   |   |                     |              |

Rate the degree to which you agree with the following statements:

|                                                                                                                                  | Do Not Agree at All | 2 | 3 | 4 | Very Much Agree |
|----------------------------------------------------------------------------------------------------------------------------------|---------------------|---|---|---|-----------------|
| 1. On a personal level, I am dealing well with the crisis                                                                        |                     |   |   |   |                 |
| 2. On a familial level, I am dealing well with the crisis                                                                        |                     |   |   |   |                 |
| 3. I feel that the leaders of the system have a good understanding of the hardships on the ground                                |                     |   |   |   |                 |
| 4. I am concerned for my health                                                                                                  |                     |   |   |   |                 |
| 5. I am concerned for my family's health                                                                                         |                     |   |   |   |                 |
| 6. I am concerned over economic hardships due to the crisis                                                                      |                     |   |   |   |                 |
| 7. I feel that my work colleagues need emotional/mental support                                                                  |                     |   |   |   |                 |
| 8. I feel burnt out from coping with the coronavirus crisis                                                                      |                     |   |   |   |                 |
| 9. I feel my fellow workers are suffering from burnout                                                                           |                     |   |   |   |                 |
| 10. I support the way the country has managed the coronavirus crisis up to this point                                            |                     |   |   |   |                 |
| 11. The State of Israel is managing the crisis better than European countries                                                    |                     |   |   |   |                 |
| 12. I think the general population in Israel is complying with the Health Ministry's directives                                  |                     |   |   |   |                 |
| 13. I think that Barzilai Medical Center's experience coping with security crises has helped it cope with the coronavirus crisis |                     |   |   |   |                 |

Gender: 1. Male 2. Female 3. Other: \_\_\_\_

Age: \_\_\_\_\_

Job: Doctor, Nurse, Technician, Administration, Paramedical, Laboratory, Pharmacist, Other: \_\_\_\_\_

Family status: I have a partner / I don't have a partner

Do you have children? (You can select more than one answer):

No

Yes, aged 0-10

Yes, aged 11-18

Yes, over 18

What department do you normally work in? \_\_\_\_\_

What department are you working in during the Coronavirus crisis?

\_\_\_\_\_
