# Supplementary material for: Facing the Unknown: Healthcare Workers’ Concerns, Experiences, and Burnout during the COVID-19 Pandemic—A Mixed-Methods Study in an Israeli Hospital
Source: MDPI journal article supplement (doi:10.3390/su13169021), 2021-08-12
Supplement: s1 [file s1]

## **Supplementary S2:**

### **In-Depth Interview Questions for Corona Ward Staff**

1. Tell me about yourself; what is your routine job, and how has your job changed since the beginning of the coronavirus outbreak? What motivated you to volunteer in the coronavirus ward? How long have you worked in the coronavirus ward?
2. Tell me a little about the ward: number of beds, number of patients hospitalized in the ward, number of patients that are severely ill/on a ventilator, staff in the ward, shifts, etc.
3. Was working in the coronavirus ward a unique experience for you? How was it different from your routine work?
4. Have you encountered new ethical dilemmas, which you had not encountered before the outbreak?
5. What feelings have come up for since the outbreak? [Depending on the answer, encourage the respondent to talk about issues s/he did not mention: are you afraid of contracting the virus, are you afraid on infecting your family, are you concerned that there is no effective treatment for the virus, are you concerned over PPE shortages, are you concerned about rate of infection and that hospitals will run out of beds or ventilators?]
6. How do you manage to balance work and family demands during the crisis?
7. What is your primary concern at the moment, on both a personal and general level?
8. What is your primary concern about the future after the crisis is over, on both a personal and general level?
9. Have you discovered anything new about yourself during this period? Have you discovered something new about the healthcare system?
10. In your opinion, how prepared was the Israeli healthcare system for such a crisis? How prepared was your hospital?
11. What is your view on how the crisis is being managed by decision-makers? Do you feel that there is clear leadership in the healthcare system? [If this is not addressed, ask: Do you feel there are people to depend on or do you feel disappointed in the leadership?]
12. How have you experienced your hospital's management of the crisis? What would you expect from hospital management in a situation such as this one?

13. What do you think about burnout during this period? With regards to yourself as well as your fellow team members on the ward. How long do you think work can continue this format?
14. In your opinion, should workers on the coronavirus wards be provided emotional and mental help and support?
15. In your opinion, can the healthcare system in general, and hospitals in particular, return to the status quo from before the crisis? What lessons should be learned from this crisis?
16. Is there anything you would like to add?

### Participant Consent Form

I, the below signed:

Last name: \_\_\_\_\_ First name: \_\_\_\_\_

1. Hereby declare that I am a competent adult and agree to participate in the study described in this document.
2. Confirm that \_\_\_\_\_ explained to me that the current study on **In-depth Interviews with Medical Staff in Coronavirus Wards** was approved by the Ethics Committee of Ashkelon Academic College, and I am aware of the following:
  - a. That I am free to withdraw from the interview at any time.
  - b. That my personal identity will remain fully confidential in scientific publications or any other publication of this study.
  - c. Should any problem arise related to the study, I can turn to the researcher for additional consultation.
  - d. I am not aware of any medical, legal or other impediment to my participation in the study.
3. Hereby declare that I was provided with detailed information on the study, including information on the study objectives, methodology, anticipated duration, risks and discomfort that might arise owing to participation in the study.

4. Hereby declare that my consent was given voluntarily after I read and understood all the above.
5. I give my permission to record and transcribe my comments.

|                     |           |       |
|---------------------|-----------|-------|
| _____               | _____     | _____ |
| Name of participant | Signature | Date  |

6. Researcher's declaration

I have received the above consent, after I explained all of the above to the participant and verified that s/he understood all of the explanations.

|       |           |       |
|-------|-----------|-------|
| _____ | _____     | _____ |
| Name  | Signature | Date  |
